# Supplementary material for: An Adaptive Decomposition Approach with Dipole Aggregation Model for Polarimetric SAR Data
Source: MDPI journal article supplement (doi:10.3390/rs13132583), 2021-07-01
Supplement: s1 [file s1]

## Supplementary Materials

Table S1 shows the statistical results of the aggregation parameter over Wuhan, China, where the highest value of  $\gamma$  is also corresponding to the 45° oriented buildings. Figure 1 shows that most of the pixels in 45° oriented building are dark blue ( $\gamma > 1.5$ ).

Table S2, Table S3, and Table S4 show the statistical results of the estimated scattering powers in 8 types of samples over Wuhan, China. Figure S2, Figure S3 and Figure S4 present the output maps of ADAM, FDD and 7CD in 8 types of samples over Wuhan, China.

**Table S1.** The statistical results of the aggregation parameter  $\gamma$  for 8 types of samples over Wuhan, China.

|                       | Aggregation parameter $\gamma$ |      |
|-----------------------|--------------------------------|------|
|                       | Mean                           | STD  |
| 20° oriented building | 1.02                           | 0.70 |
| 40° oriented building | 1.43                           | 1.21 |
| 45° oriented building | 1.99                           | 1.66 |
| 50° oriented building | 1.45                           | 1.25 |
| 70° oriented building | 1.18                           | 0.76 |
| 80° oriented building | 0.89                           | 0.51 |
| Forest                | 2.44                           | 1.45 |
| Water                 | 0.73                           | 0.25 |

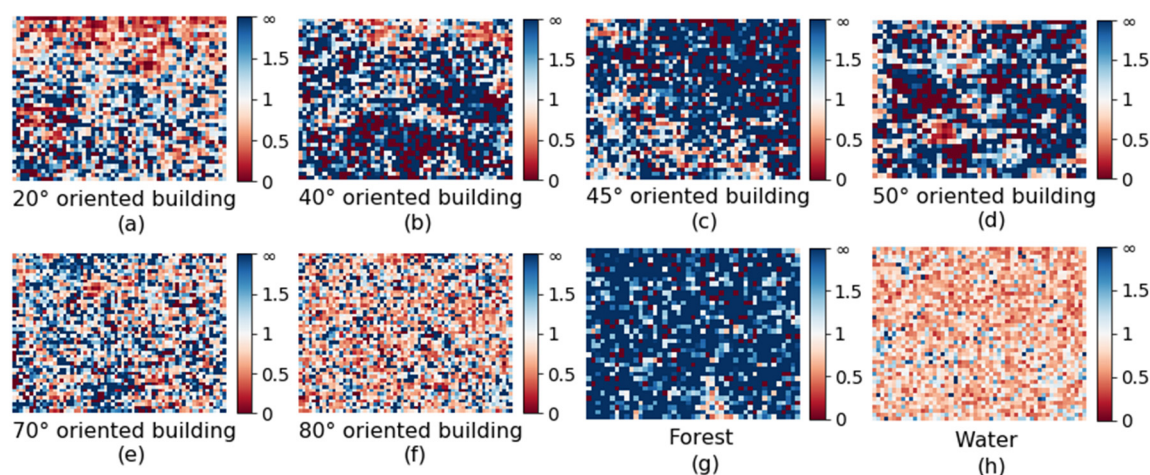

**Figure S1.** The determined aggregation parameter  $\gamma$  of building samples over Wuhan, China.

**Table S2.** The statistical results of the  $P_s$  in 8 types of samples over Wuhan, China.

| $P_s$                 | Mean |       |      | STD  |      |      |
|-----------------------|------|-------|------|------|------|------|
|                       | ADAM | FDD   | 7CD  | ADAM | FDD  | 7CD  |
| San Francisco, USA    |      |       |      |      |      |      |
| 20° oriented building | 0.07 | 0.06  | 0.18 | 0.09 | 0.15 | 0.17 |
| 40° oriented building | 0.04 | -0.03 | 0.24 | 0.08 | 0.24 | 0.23 |
| 45° oriented building | 0.06 | -0.02 | 0.23 | 0.10 | 0.22 | 0.20 |
| 50° oriented building | 0.03 | -0.02 | 0.20 | 0.06 | 0.19 | 0.19 |
| 70° oriented building | 0.05 | 0.04  | 0.18 | 0.07 | 0.12 | 0.16 |
| 80° oriented building | 0.10 | 0.11  | 0.26 | 0.12 | 0.20 | 0.24 |

|        |      |      |      |      |      |      |
|--------|------|------|------|------|------|------|
| Forest | 0.07 | 0.01 | 0.19 | 0.08 | 0.14 | 0.09 |
| Water  | 0.01 | 0.01 | 0.01 | 0.00 | 0.00 | 0.00 |

**Table S3.** The statistical results of the  $P_d$  in 8 types of samples over Wuhan, China.

| $P_d$                | Mean |      |      | STD  |      |      |
|----------------------|------|------|------|------|------|------|
|                      | ADAM | FDD  | 7CD  | ADAM | FDD  | 7CD  |
| San Francisco, USA   |      |      |      |      |      |      |
| 20°oriented building | 0.29 | 0.29 | 0.26 | 0.32 | 0.34 | 0.29 |
| 40°oriented building | 0.40 | 0.31 | 0.20 | 0.37 | 0.35 | 0.23 |
| 45°oriented building | 0.19 | 0.09 | 0.13 | 0.19 | 0.21 | 0.13 |
| 50°oriented building | 0.27 | 0.18 | 0.13 | 0.26 | 0.25 | 0.14 |
| 60°oriented building | 0.27 | 0.26 | 0.23 | 0.27 | 0.27 | 0.23 |
| 70°oriented building | 0.40 | 0.43 | 0.36 | 0.37 | 0.39 | 0.33 |
| Forest               | 0.11 | 0.04 | 0.09 | 0.06 | 0.11 | 0.05 |
| Water                | 0.01 | 0.01 | 0.01 | 0.00 | 0.00 | 0.00 |

**Table S4.** The statistical results of the  $P_v$  in 8 types of samples over Wuhan, China.

| $P_v$                | Mean |      |       | STD  |      |      |
|----------------------|------|------|-------|------|------|------|
|                      | ADAM | FDD  | 7CD   | ADAM | FDD  | 7CD  |
| San Francisco, USA   |      |      |       |      |      |      |
| 20°oriented building | 0.32 | 0.34 | -0.24 | 0.24 | 0.28 | 0.35 |
| 40°oriented building | 0.53 | 0.70 | -0.43 | 0.36 | 0.54 | 0.54 |
| 45°oriented building | 0.47 | 0.69 | -0.01 | 0.36 | 0.56 | 0.23 |
| 50°oriented building | 0.41 | 0.59 | -0.21 | 0.30 | 0.51 | 0.35 |
| 60°oriented building | 0.32 | 0.35 | -0.17 | 0.21 | 0.25 | 0.27 |
| 70°oriented building | 0.44 | 0.40 | -0.41 | 0.26 | 0.23 | 0.49 |
| Forest               | 0.31 | 0.46 | 0.09  | 0.11 | 0.18 | 0.14 |
| Water                | 0.01 | 0.01 | -0.01 | 0.00 | 0.00 | 0.00 |

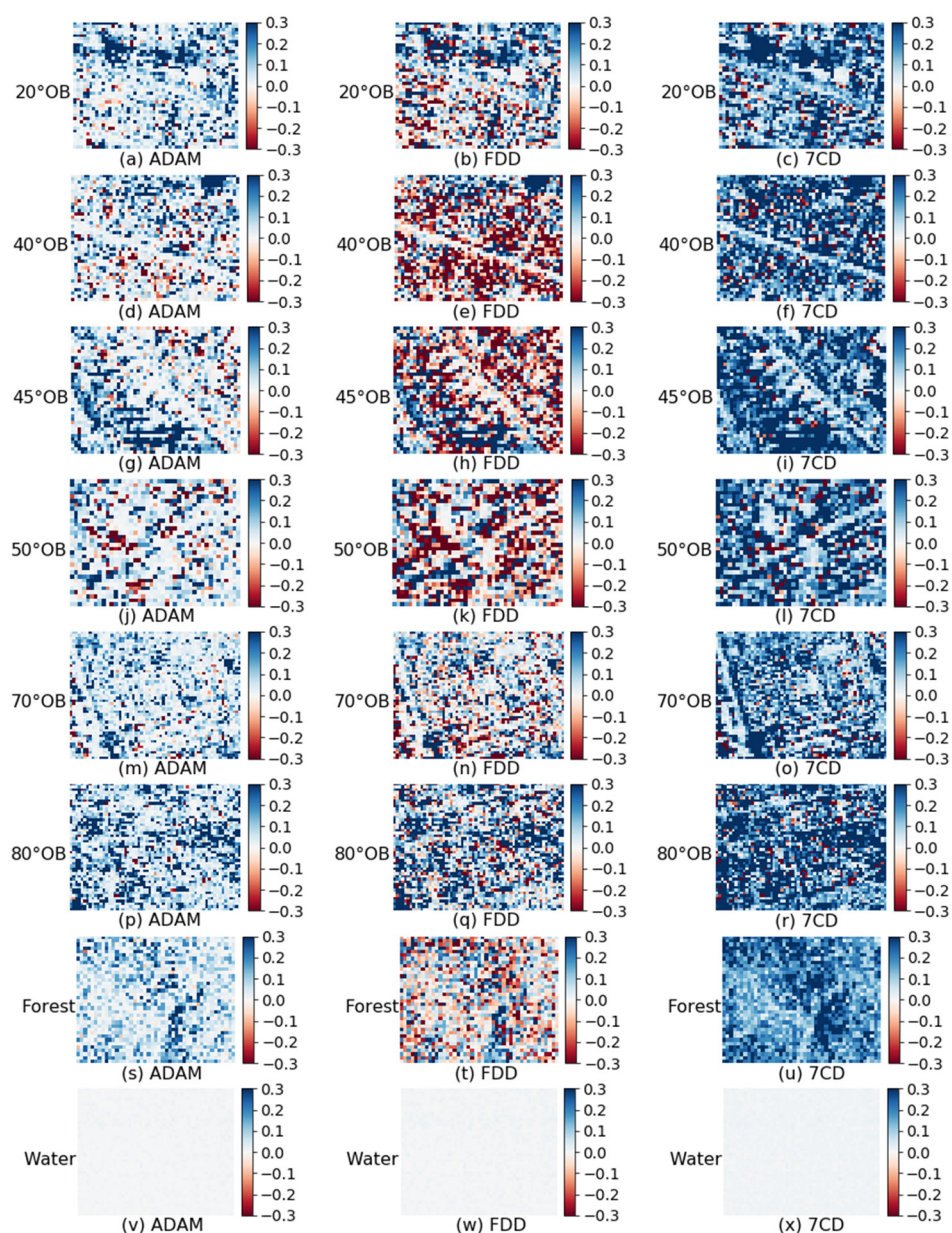

**Figure S2.** The output map of surface scattering power  $P_s$  estimated by ADAM, FDD and 7CD for 8 types of samples over Wuhan, China.



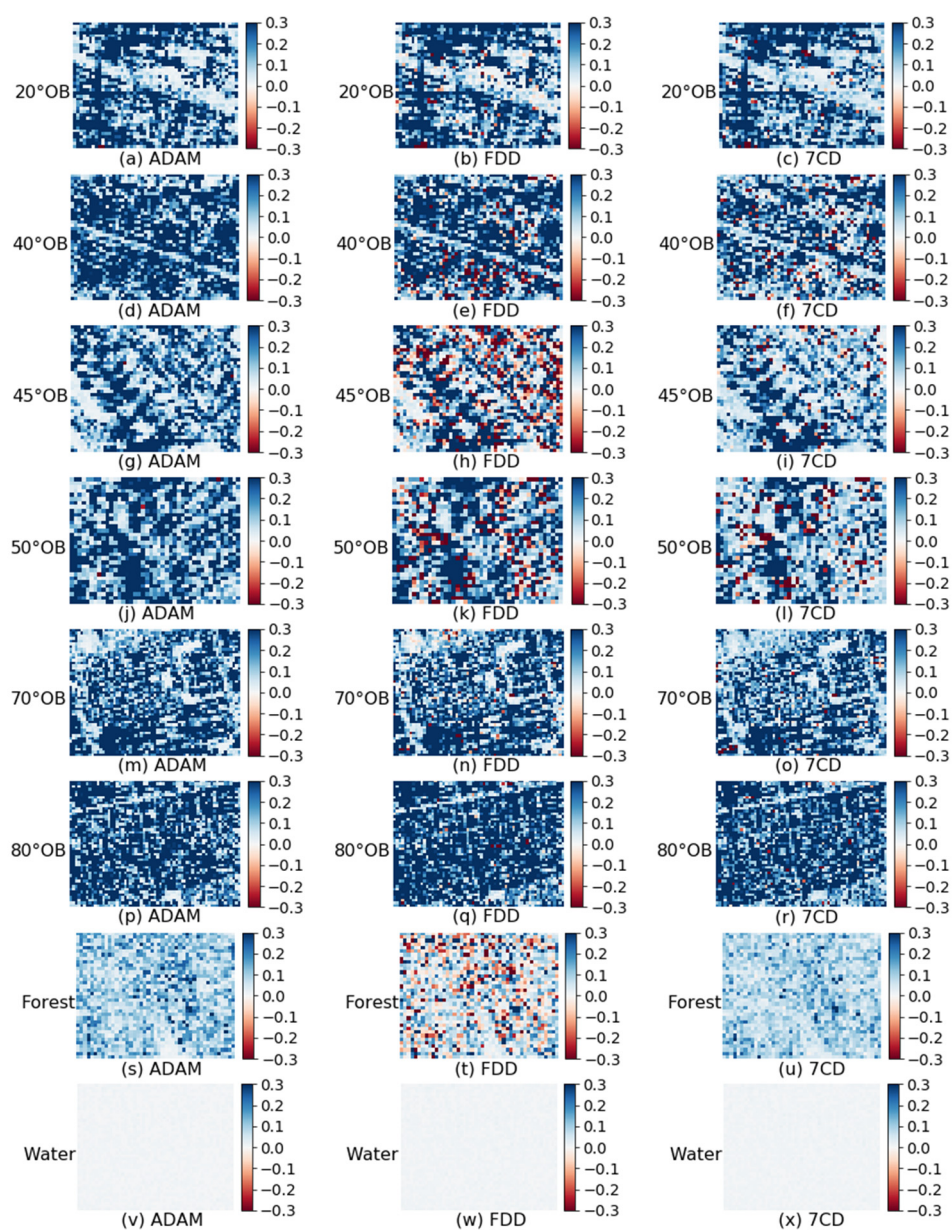

**Figure S3.** The output map of double-bounce scattering power  $P_d$  estimated by ADAM, FDD and 7CD for 8 types of samples over Wuhan, China.

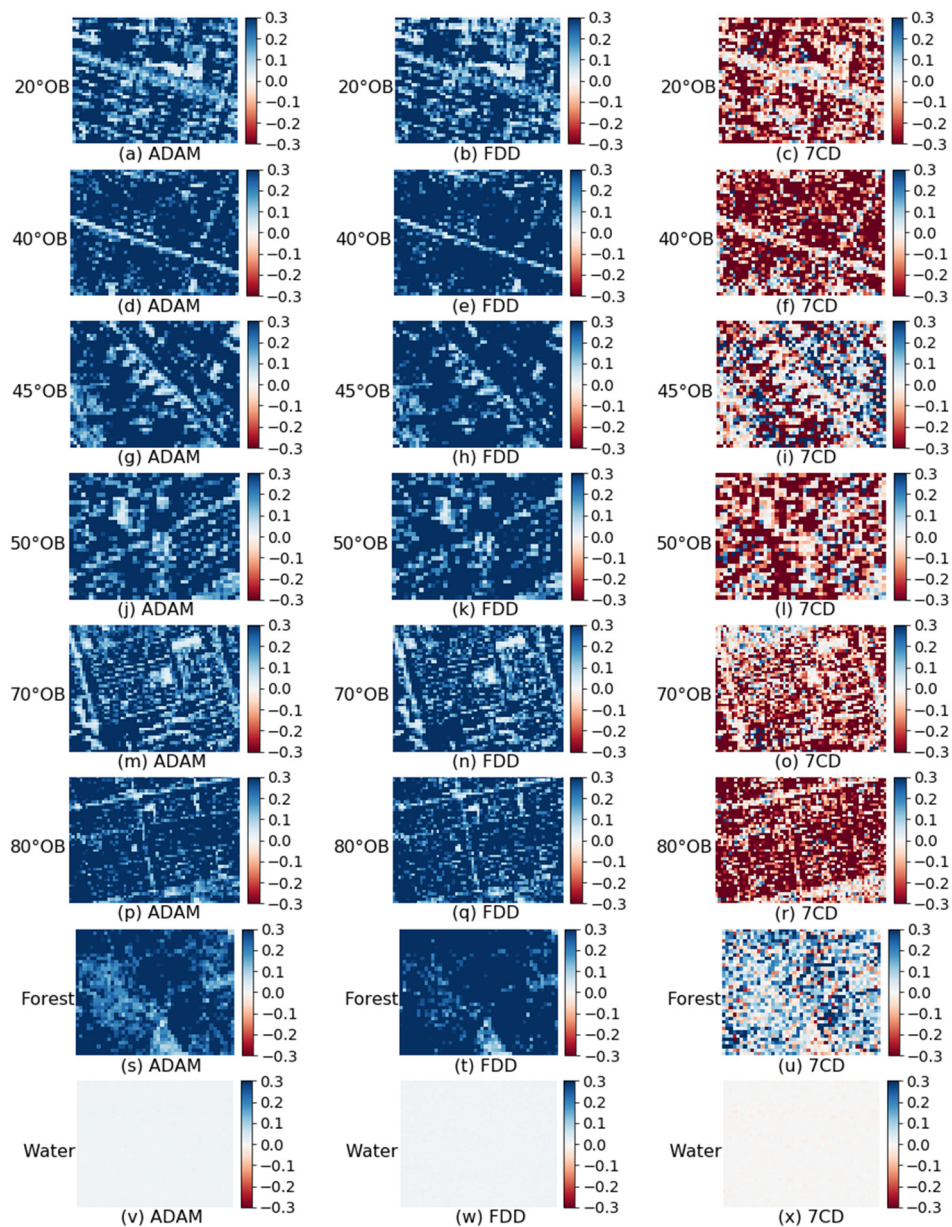

**Figure S4.** The output map of volume scattering power  $P_v$  estimated by ADAM, FDD and 7CD for 8 types of samples over Wuhan, China.
